# Supplementary material for: An NADPH oxidase regulates carbon metabolism and the cell cycle during root nodule symbiosis in common bean (Phaseolus vulgaris)
Source: PubMed Central journal article supplement (PMC8207584; doi:10.1186/s12870-021-03060-z), 2021-06-15
Supplement: 12870_2021_3060_MOESM1_ESM.pdf [file 12870_2021_3060_MOESM1_ESM.pdf]

Supplementary materials

**An NADPH oxidase regulates carbon metabolism and the cell cycle during root nodule symbiosis in common bean (*Phaseolus vulgaris*)**

Citlali Fonseca-García, Noreide Nava, Miguel Lara, and Carmen Quinto\*

Departamento de Biología Molecular de Plantas, Instituto de Biotecnología, Universidad Nacional Autónoma de México, Avenida Universidad 2001, Colonia Chamilpa, Cuernavaca, Morelos 62210, Mexico.

Citlali Fonseca-García: [citlali.fonseca@ibt.unam.mx](mailto:citlali.fonseca@ibt.unam.mx);

Noreide Nava: [noreide.nava@ibt.unam.mx](mailto:noreide.nava@ibt.unam.mx)

Miguel Lara: [mlara@unam.mx](mailto:mlara@unam.mx)

Carmen Quinto\*: [carmen.quinto@ibt.unam.mx](mailto:carmen.quinto@ibt.unam.mx); Tel.: +52-777-329-1642

\*Corresponding author

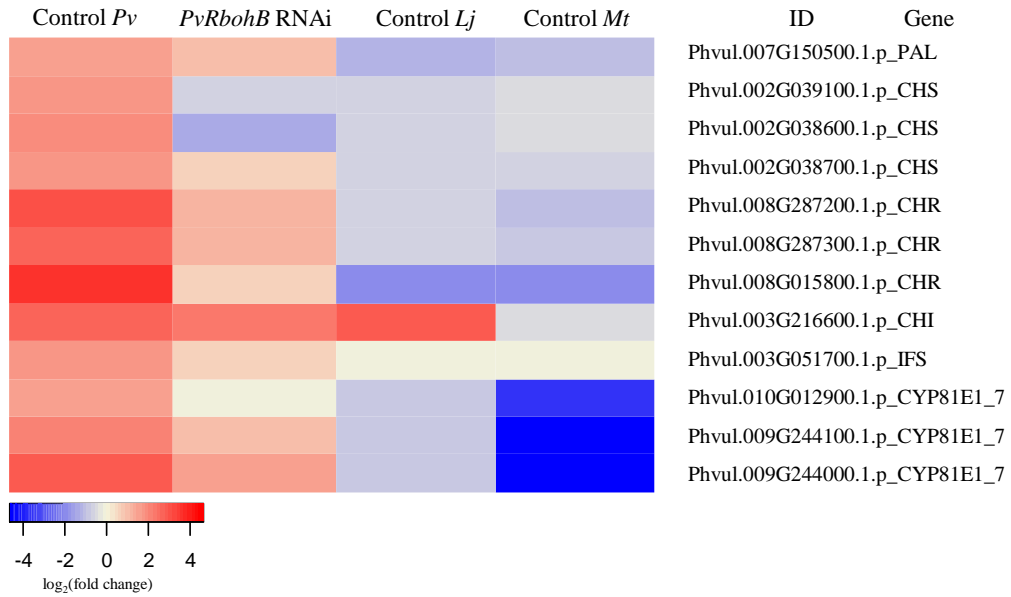

Figure S1. Expression profiles of genes related to the isoflavonoid biosynthesis pathway in legumes. DEGs encoding proteins related to isoflavonoid biosynthesis in control and *PvRbohB*-RNAi *P. vulgaris* roots at 7 dpi with *R. tropici*, together with their orthologous genes from wild-type *L. japonicus* roots inoculated with *M. loti* at 7 dpi, as well as *M. truncatula* nodules at 6 dpi with *S. meliloti*. The color bars represent the log<sub>2</sub>(fold change), with red representing upregulated genes and blue representing downregulated genes. A cut-off threshold of log<sub>2</sub>FC ≥ 1.5, Padj/FDR ≤ 0.05 was used.

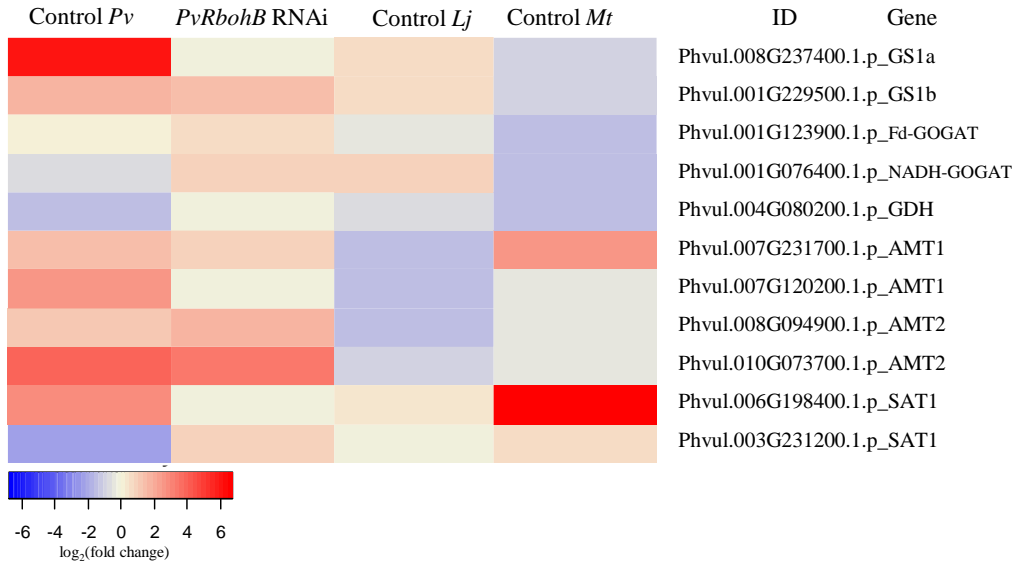

Figure S2. DEGs related to fixed ammonia assimilation and transmembrane transporters in nodules. The heatmap shows the DEGs from control and *PvRbohB*-RNAi *P. vulgaris* roots at 7 dpi with *R. tropici*, together with their orthologous genes from wild-type *L. japonicus* roots inoculated with *M. loti* at 7 dpi, as well as *M. truncatula* nodules at 6 dpi with *S. meliloti*. The color bars represent the  $\log_2(\text{fold change})$ , with red representing upregulated genes and blue representing downregulated genes. A cut-off threshold of  $\log_2\text{FC} \geq 1.5$ ,  $\text{P}_{\text{adj}}/\text{FDR} \leq 0.05$  was used.

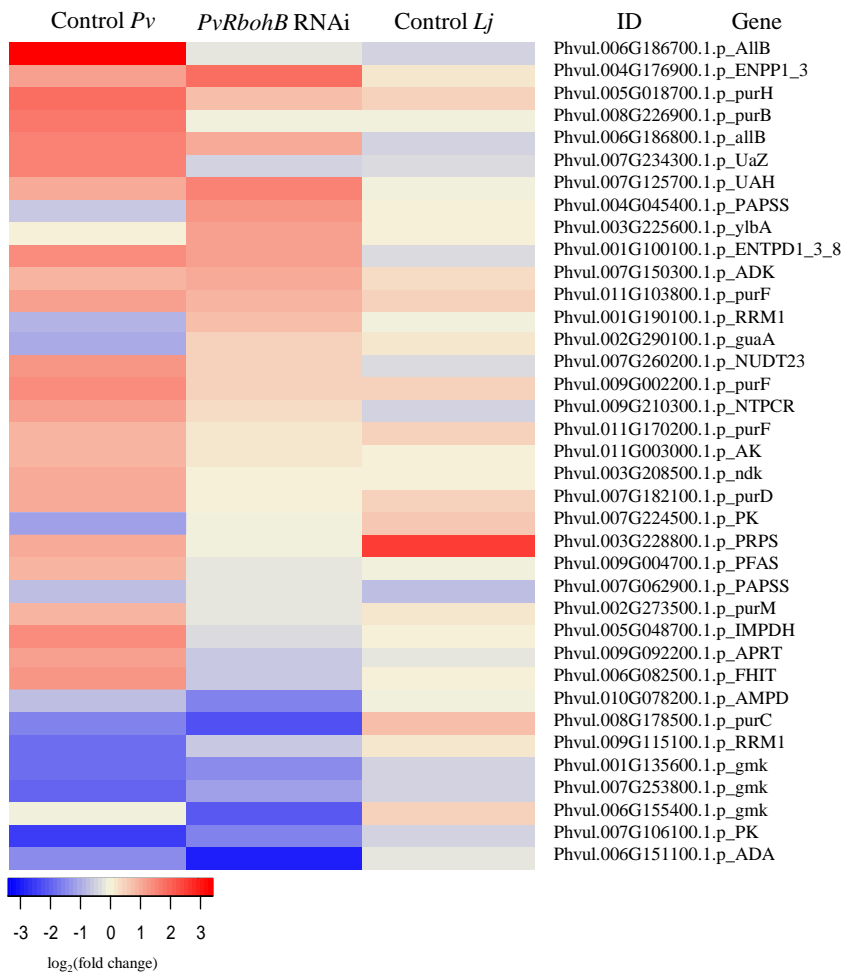

Figure S3. Heatmap of the expression patterns of genes related to ureide biosynthesis. DEGs encoding proteins related to ureide metabolism in control and *PvRbohB*-RNAi *P. vulgaris* roots at 7 dpi with rhizobia. Their respective orthologous genes from wild-type *L. japonicus* roots inoculated with *M. loti* at 7 dpi, were included in the analysis, along with *M. truncatula* nodules at 6 dpi with *S. meliloti*. The color bars represent the log<sub>2</sub>(fold change), with red representing upregulated genes and blue representing downregulated genes. A cut-off threshold of log<sub>2</sub>FC ≥ 1.5, P<sub>adj</sub>/FDR ≤ 0.05 was used.

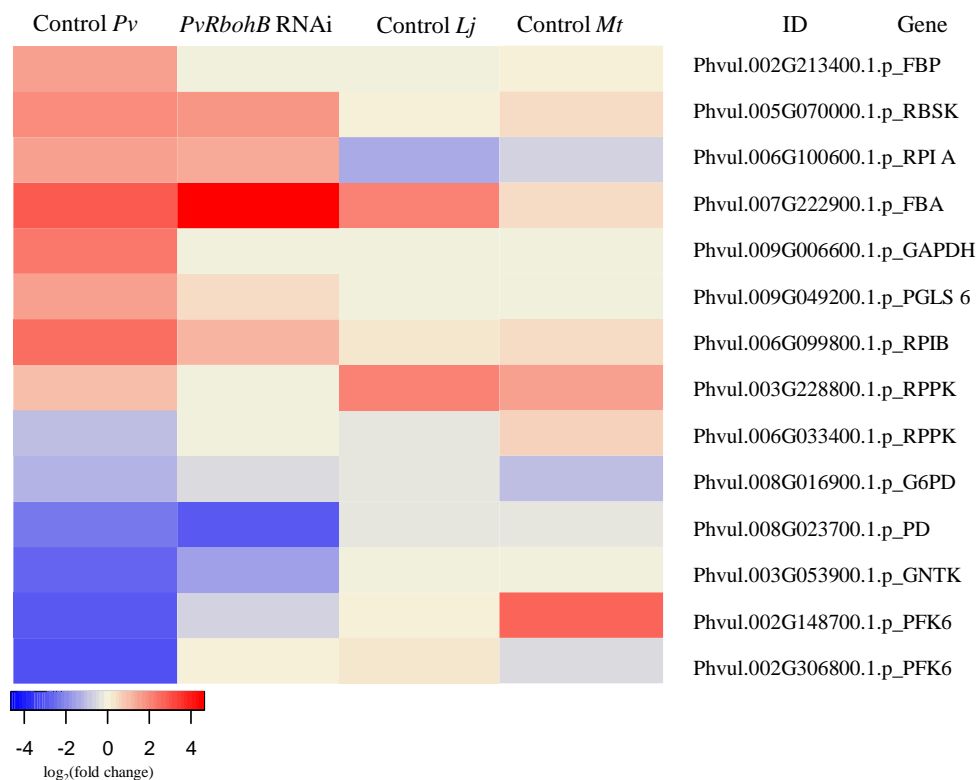

Figure S4. DEGs related to the oxidative and non-oxidative phases of the Pentose Phosphate Pathway (PPP). Data were analyzed in control and *PvRbohB*-RNAi *P. vulgaris* roots at 7 dpi with rhizobia. Their respective orthologous genes from wild-type *L. japonicus* roots inoculated with *M. loti* at 7 dpi were included in the analysis, along with *M. truncatula* nodules at 6 dpi with *S. meliloti*. The color bars represent the  $\log_2(\text{fold change})$ , with red representing upregulated genes and blue representing downregulated genes. A cut-off threshold of  $\log_2\text{FC} \geq 1.5$ ,  $\text{Padj}/\text{FDR} \leq 0.05$  was used.

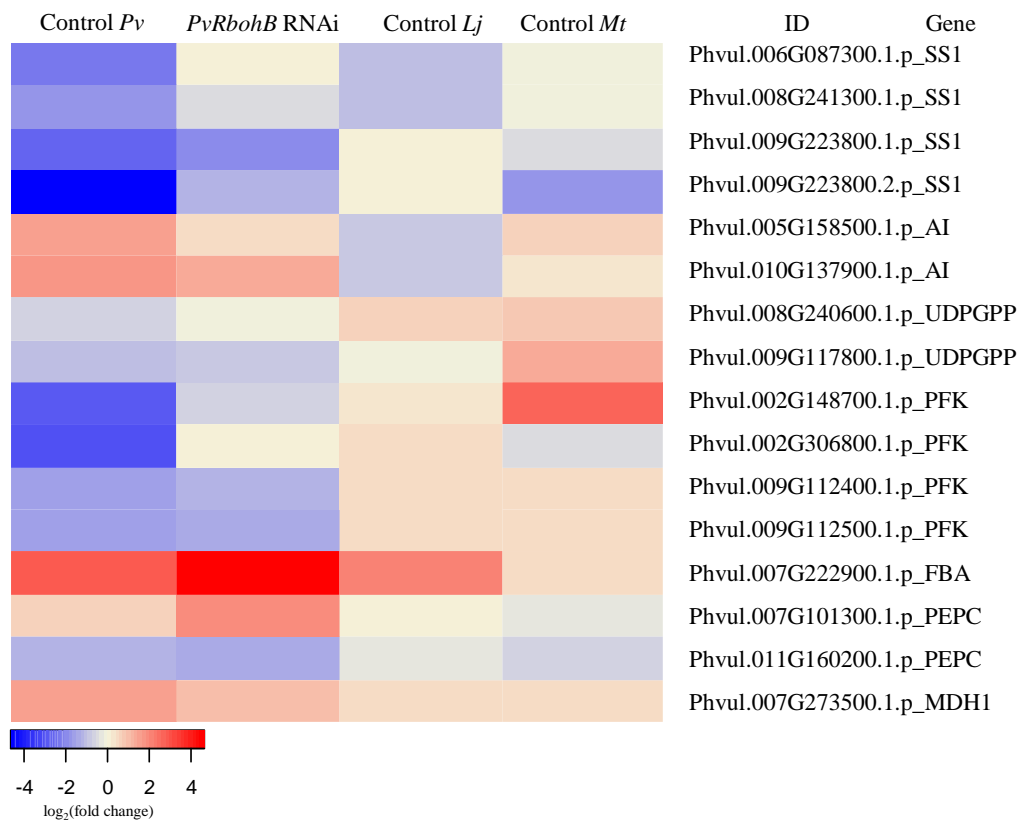

Figure S5. Expression profiles of genes related to sucrose catabolism to provide carbon skeletons to nodules. DEGs related to sucrose catabolism in control and *PvRbohB*-RNAi *P. vulgaris* roots at 7 dpi with rhizobia; their orthologous genes from wild-type *L. japonicus* roots inoculated with *M. loti* at 7 dpi were including in the analysis, along with *M. truncatula* nodules at 6 dpi with *S. meliloti*. The color bars represent the  $\log_2(\text{fold change})$ , with red representing upregulated genes and blue representing downregulated genes. A cut-off threshold of  $\log_2\text{FC} \geq 1.5$ ,  $\text{Padj}/\text{FDR} \leq 0.05$  was used.

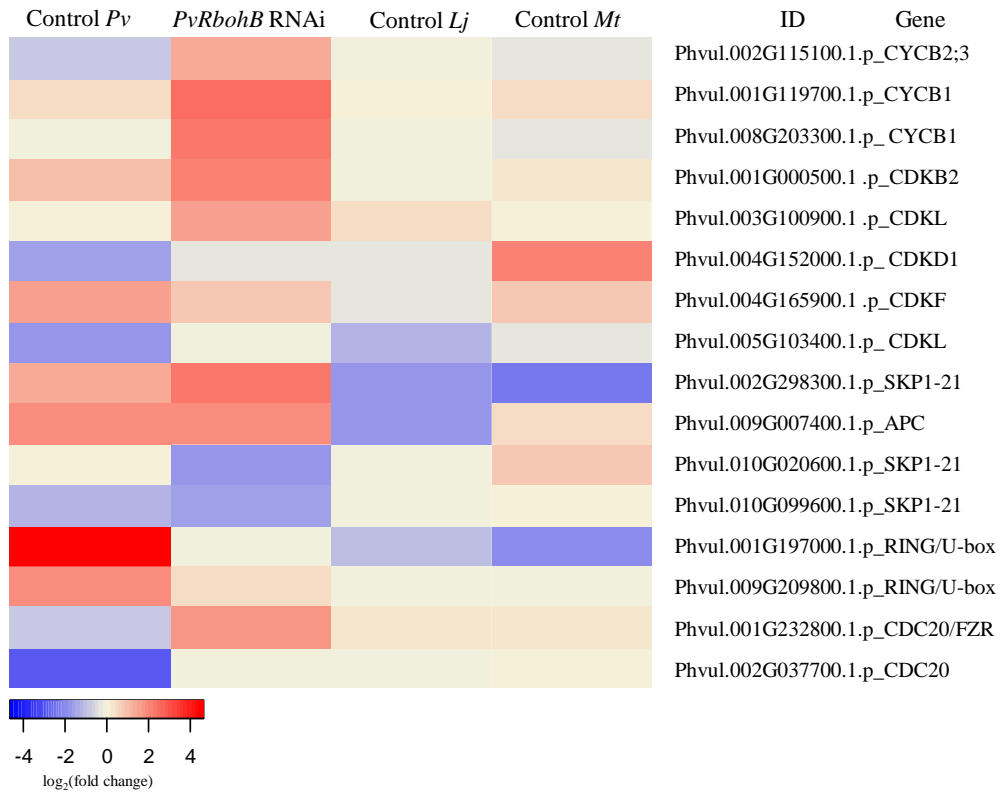

Figure S6. DEGs involved in regulating the cell cycle in control and *PvRbohB*-RNAi *P. vulgaris* roots. Their respective orthologous genes from wild-type roots of *L. japonicus* inoculated with *M. loti* at 7 dpi were included in the analysis, along with *M. truncatula* nodules at 6 dpi with *S. meliloti*. The color bars represent the  $\log_2(\text{fold change})$  of the DEG, with red and blue representing upregulated and downregulated genes, respectively. A cut-off threshold of  $\log_2\text{FC} \geq 1.5$ ,  $\text{P}_{\text{adj}}/\text{FDR} \leq 0.05$  was used.
