# Supplementary material for: An NADPH oxidase regulates carbon metabolism and the cell cycle during root nodule symbiosis in common bean (Phaseolus vulgaris)
Source: PubMed Central journal article supplement (PMC8207584; doi:10.1186/s12870-021-03060-z), 2021-06-15
Supplement: 12870_2021_3060_MOESM2_ESM.pdf [file 12870_2021_3060_MOESM2_ESM.pdf]

Table S1. Gene-specific oligonucleotides used for RT-qPCR analysis.

| Gene              | Tag              | Primer sequence (5'→3')            | Amplicon size (bp) | Efficiency (%) |
|-------------------|------------------|------------------------------------|--------------------|----------------|
| <i>PvEfla</i>     | Efl $\alpha$ -Up | GGT CAT TGG TCA TGT CGA<br>CTC TGG | 146                | 98             |
|                   | Efl $\alpha$ -Lw | GCA CCC AGG CAT ACT TGA<br>ATG ACC |                    |                |
| <i>PvENOD2</i>    | ENOD2-Up         | AGT GTA CAC ACC CCC ACC<br>ATA CCA | 137                | ND             |
|                   | ENOD2-Lw         | TCT TGG ATG GTG GAT AGT<br>GGC CA  |                    |                |
| <i>PvCyclinB1</i> | CCN-B_Fw         | GGC CAA CGC ACA AGA GAA<br>GAA C   | 137                | 96             |
|                   | CCN-B_Rv         | CCT CCG ATT CAT CAT CAT<br>CGC     |                    |                |
| <i>PvGS</i>       | GS_Fw            | CAG GAG GGG TAA CAA TAT<br>CCT GG  | 189                | 114            |
|                   | GS_Rv            | CAT CCA ACA GGC CAC TGA<br>ACA TC  |                    |                |
| <i>PvSAT1</i>     | SAT1_Fw          | GGG ACT AGG GAA ACC TAA<br>GGT GG  | 119                | 91             |
|                   | SAT1_Rv          | GGC TGG CCT TGA AGT GGT<br>AG      |                    |                |
| <i>PvALL</i>      | ALL_Fw           | GTG CTC TCC TCC CAT TCG<br>TG      | 115                | 119            |
|                   | ALL_Rv           | CTT GAG TTG AGG CAG GGT<br>TGG     |                    |                |
| <i>PvUA</i>       | UA_Fw            | GCT ATA CAA CCT CCC TCA<br>GAA GCC | 111                | 116            |
|                   | UA_RvCp          | GGG CTA TAG ACT CCC CTG<br>TTT GG  |                    |                |

ND: Not determined
